# Supplementary material for: Lineage, Antimicrobial Resistance and Virulence of Citrobacter spp
Source: PubMed Central journal article supplement (PMC7157202; doi:10.3390/pathogens9030195), 2020-03-06
Supplement: pathogens-09-00195-s001.pdf [file pathogens-09-00195-s001.pdf]

**Fig. S1** Phylogenetic relationships as determined by MLST data for the 123 *C. freundii* isolates from this study and two previous studies [10, 16]. Cluster divisions are marked and were consistent with our previous division [16]. Numbers on or near the nodes are bootstrap values from 1,000 replicates and shown if  $\geq 50\%$ . The tree was constructed using neighbor joining algorithm. ST indicate sequence types.

— ST296 HB2016038  
 — ST298 HB2016023  
 — ST227 AH2019013  
 — ST173 AH2014040  
 — ST318 HB2017031  
 — ST199 AH2014016  
 — ST303 HB2017006  
 — ST222 AH2015007  
 — ST304 HB2017009  
 — ST174 AH2014012  
 — ST175 AH2014022  
 — ST17 AH2014007 AH2018021 HB2016004  
 — ST338 HB2017053  
 — ST331 HB2017045  
 — ST236 AH2016007  
 — ST289 HB2016024  
 — ST326 HB2017042  
 — ST301 HB2017003  
 — ST326 HB2017040  
 — ST172 AH2014042  
 — ST322 HB2017036  
 — ST236 AH2016030  
 — ST325 HB2017039  
 — ST201 AH2014019  
 — ST203 AH2014022  
 — ST284 HB2016019  
 — ST344 HB2017080  
 — ST343 HB2017059  
 — ST196 AH2014010  
 — ST85 AH201007 AH2018011 HB2017004  
 — ST339 HB2017054  
 — ST196 AH2014031 AH2014034  
 — ST220 AH2015003  
 — ST300 HB2017002  
 — ST313 HB2017026  
 — ST191 AH2014041  
 — ST309 HB2017016  
 — ST306 HB2017012  
 — ST290 HB2016034  
 — ST320 HB2017033  
 — ST45 AH2008007 AH2015011  
 — ST211 AH2014047  
 — ST324 HB2017038  
 — ST1 HB2017017 HB2017061  
 — ST232 AH2016001  
 — ST337 HB2017052  
 — ST125 HB2017018  
 — ST185 AH2014039 AH2018010  
 — ST214 AH2015009 HB2017051  
 — ST312 HB2017025  
 — ST308 HB2017014  
 — ST190 HB2017024  
 — ST210 HB2017020  
 — ST31 AH2007014  
 — ST341 HB2017057  
 — ST333 HB2017047  
 — ST47 AH2008009  
 — ST232 HB2017048  
 — ST116 AH2014015  
 — ST270 HB2016003  
 — ST314 HB2017027  
 — ST327 HB2017041  
 — ST229 AH2016009  
 — ST282 HB2015017  
 — ST9 AH2015015  
 — ST43 AH2008005  
 — ST184 AH2011006  
 — ST176 AH2014046  
 — ST317 HB2017030  
 — ST340 HB2017056  
 — ST320 HB2017043  
 — ST323 HB2017037  
 — ST196 AH2007018  
 — ST34 AH2008001  
 — ST278 HB2016013  
 — ST186 AH2014014  
 — ST274 HB2016008  
 — ST279 HB2016010  
 — ST211 HB2017022  
 — ST42 AH2008004  
 — ST163 HB2017011  
 — ST272 HB2016006  
 — ST100 HB2018011 HB2017034  
 — ST215 AH2015013  
 — ST216 AH2015012 HB2018002  
 — ST44 AH2008006  
 — ST177 AH2014046  
 — ST217 AH2015008 HB2017019  
 — ST96 AH2011006 AH2011009  
 — ST41 HB2017055 AH2014018  
 — ST235 AH2016004  
 — ST212 AH2015005  
 — ST228 AH2016006  
 — ST210 AH2014043  
 — ST281 HB2016018  
 — ST12 AH2015001 HB2017008  
 — ST46 AH2008008  
 — ST189 HB2017001  
 — ST277 HB2016012  
 — ST19 AH2015008 AH2015017 HB2017023  
 — ST269 HB2016001  
 — ST307 HB2017013  
 — ST321 HB2017035  
 — ST319 HB2017032  
 — ST235 HB2017046  
 — ST223 AH2015020  
 — ST207 AH2014028  
 — ST226 AH2015019  
 — ST196 AH2014005  
 — ST197 AH2014008  
 — ST109 AH2015002  
 — ST205 AH2014023  
 — ST221 AH2015004  
 — ST233 AH2016005  
 — ST194 AH2014001  
 — ST231 AH2016003  
 — ST225 AH2015010 AH2016015  
 — ST234 AH2016002  
 — ST200 AH2014017  
 — ST178 AH2014027  
 — ST234 AH2016008  
 — ST237 AH2016008  
 — ST213 AH2015016  
 — ST206 AH2014024  
 — ST224 AH2015014  
 — ST202 AH2014020  
 — ST192 AH2014044  
 — ST193 AH2014045  
 — ST179 AH2014013  
 — ST190 AH2014035  
 — ST195 AH2014032  
 — ST187 AH2014032 AH2018012  
 — ST188 AH2014003  
 — ST189 AH2014004  
 — ST180 AH2014006  
 — ST216 AH2015018  
 — ST181 AH2014033  
 — ST184 AH2014020  
 — ST230 AH2016014  
 — ST30 AH2014011  
 — ST162 AH2014009  
 — ST163 AH2014026 HB2019026  
 — Salmonella LT2

Cluster 1 (Lineage I)

Cluster 2 (Lineage II)

Cluster 3

Cluster 4

Cluster 6

Cluster 5

Table S1 List of clonal complexes of *Citrobacter* isolates from this study and the public MLST database<sup>#</sup>

| CCs | STs | Isolates    | species            | Source            | Year | Country/location |
|-----|-----|-------------|--------------------|-------------------|------|------------------|
| 1   | 288 | HB2016023   | <i>C. freundii</i> | food              | 2016 | Hebei Province   |
| 1   | 17  | AH2014007   | <i>C. freundii</i> | diarrheal patient | 2014 | Anhui Province   |
| 1   | 17  | AH2014021   | <i>C. freundii</i> | diarrheal patient | 2014 | Anhui Province   |
| 1   | 17  | HB2016004   | <i>C. freundii</i> | diarrheal patient | 2016 | Hebei Province   |
| 1   | 17  | NMI_5868/12 | <i>C. freundii</i> | skin necrosis     | 2012 | Poland           |
| 1   | 17  | NMI_5220/12 | <i>C. freundii</i> | urine             | 2012 | Poland           |
| 1   | 17  | M818        | <i>C. freundii</i> | rectal swab       | 2008 | Latvia           |
| 1   | 17  | M829        | <i>C. freundii</i> | rectal swab       | 2009 | Latvia           |
| 2   | 170 | 2017523     | <i>C. freundii</i> | wound             | 2017 | Spain            |
| 2   | 220 | AH2015003   | <i>C. freundii</i> | diarrheal patient | 2015 | Anhui Province   |
| 3   | 168 | N17-00150   | <i>C. freundii</i> | water             | 2015 | Canada           |
| 3   | 304 | HB2017009   | <i>C. freundii</i> | diarrheal patient | 2017 | Hebei Province   |
| 4   | 416 | ME170049C   | <i>C. freundii</i> | Rectal            | 2017 | Ireland          |
| 4   | 213 | AH2015016   | <i>C. freundii</i> | diarrheal patient | 2015 | Anhui Province   |
| 5   | 289 | HB2016024   | <i>C. freundii</i> | food              | 2016 | Hebei Province   |
| 5   | 328 | HB2017042   | <i>C. freundii</i> | food              | 2017 | Hebei Province   |
| 5   | 236 | AH2016007   | <i>C. freundii</i> | diarrheal patient | 2016 | Anhui Province   |
| 6   | 344 | HB2017060   | <i>C. freundii</i> | food              | 2017 | Hebei Province   |
| 6   | 331 | HB2017045   | <i>C. freundii</i> | food              | 2017 | Hebei Province   |
| 7   | 1   | HB2017017   | <i>C. freundii</i> | diarrheal patient | 2017 | Hebei Province   |
| 7   | 1   | HB2017061   | <i>C. freundii</i> | food              | 2017 | Hebei Province   |
| 7   | 1   | CF65        | <i>C. freundii</i> | goat              | 2011 | Henan Province   |
| 7   | 1   | CF89        | <i>C. freundii</i> | human             | 2011 | Henan Province   |
| 7   | 1   | CF90        | <i>C. freundii</i> | diarrheal patient | 2011 | Henan Province   |
| 7   | 1   | CF86        | <i>C. freundii</i> | diarrheal patient | 2011 | Henan Province   |
| 7   | 1   | CF86        | <i>C. freundii</i> | diarrheal patient | 2011 | Henan Province   |
| 7   | 1   | CF80        | <i>C. freundii</i> | diarrheal patient | 2011 | Henan Province   |
| 7   | 1   | CF81        | <i>C. freundii</i> | diarrheal patient | 2011 | Henan Province   |
| 7   | 1   | CF77        | <i>C. freundii</i> | chicken           | 2011 | Henan Province   |
| 7   | 1   | CF73        | <i>C. freundii</i> | fly               | 2011 | Henan Province   |
| 7   | 1   | CF69        | <i>C. freundii</i> | chopping board    | 2011 | Henan Province   |
| 7   | 1   | CF75        | <i>C. freundii</i> | swine             | 2011 | Henan Province   |
| 7   | 3   | CF76        | <i>C. freundii</i> | fly               | 2011 | Henan Province   |
| 7   | 3   | CF79        | <i>C. freundii</i> | diarrheal patient | 2011 | Henan Province   |
| 7   | 3   | CF93        | <i>C. freundii</i> | diarrheal patient | 2011 | Henan Province   |
| 7   | 3   | CF92        | <i>C. freundii</i> | diarrheal patient | 2011 | Henan Province   |
| 8   | 214 | AH2015009   | <i>C. freundii</i> | diarrheal patient | 2015 | Anhui Province   |
| 8   | 214 | HB2017051   | <i>C. freundii</i> | food              | 2017 | Hebei Province   |
| 8   | 321 | HB2017035   | <i>C. freundii</i> | environment       | 2017 | Hebei Province   |
| 9   | 332 | HB2017046   | <i>C. freundii</i> | food              | 2017 | Hebei Province   |
| 9   | 265 | /           | <i>C. freundii</i> | /                 | /    | Brazil           |

|    |     |             |                    |                    |      |                   |
|----|-----|-------------|--------------------|--------------------|------|-------------------|
| 9  | 69  | /           | <i>C. freundii</i> | /                  | /    | Beijing           |
| 10 | 192 | AH2014044   | <i>C. freundii</i> | human              | 2014 | Anhui Province    |
| 10 | 193 | AH2014045   | <i>C. freundii</i> | human              | 2014 | Anhui Province    |
| 11 | 176 | AH2014048   | <i>C. freundii</i> | human              | 2014 | Anhui Province    |
| 11 | 139 | /           | <i>C. freundii</i> | /                  | /    | Beijing           |
| 11 | 6   | CF74        | <i>C. freundii</i> | goat               | 2011 | Henan Province    |
| 12 | 270 | HB2016003   | <i>C. freundii</i> | diarrheal patient  | 2016 | Hebei Province    |
| 12 | 167 | N15-02052   | <i>C. freundii</i> | water              | 2015 | Canada            |
| 13 | 310 | HB2017020   | <i>C. freundii</i> | diarrheal patient  | 2017 | Hebei Province    |
| 13 | 150 | HB2017024   | <i>C. freundii</i> | diarrheal patient  | 2017 | Hebei Province    |
| 13 | 150 | /           | <i>C. freundii</i> | /                  | /    | Canada            |
| 13 | 14  | M2308       | <i>C. freundii</i> | rectal swab        | 2010 | Israel            |
| 13 | 14  | IMR208/13   | <i>C. freundii</i> | urine              | 2013 | Malaysia          |
| 13 | 14  | IMR511/13   | <i>C. freundii</i> | tissue             | 2013 | Malaysia          |
| 13 | 14  | IMR503/13   | <i>C. freundii</i> | tissue             | 2013 | Malaysia          |
| 14 | 341 | HB2017057   | <i>C. freundii</i> | food               | 2017 | Hebei Province    |
| 14 | 494 | /           | <i>C. freundii</i> | /                  | /    | France            |
| 15 | 276 | HB2016010   | <i>C. freundii</i> | environment        | 2016 | Hebei Province    |
| 15 | 261 | /           | <i>C. freundii</i> | /                  | /    | Sevilla           |
| 16 | 216 | AH2015012   | <i>C. freundii</i> | diarrheal patient  | 2015 | Anhui Province    |
| 16 | 216 | HB2016002   | <i>C. freundii</i> | diarrheal patient  | 2016 | Hebei Province    |
| 16 | 274 | HB2016008   | <i>C. freundii</i> | food               | 2016 | Hebei Province    |
| 16 | 403 | /           | <i>C. freundii</i> | /                  | /    | Shandong Province |
| 16 | 118 | Cit fre 80  | <i>C. freundii</i> | rectal swab        | 2016 | Italy             |
| 16 | 404 | /           | <i>C. freundii</i> | /                  | /    | Singapore         |
| 16 | 119 | Cit fre 145 | <i>C. freundii</i> | rectal swab        | 2016 | Italy             |
| 17 | 212 | AH2015005   | <i>C. freundii</i> | diarrheal patient  | 2015 | Anhui Province    |
| 17 | 228 | AH2016006   | <i>C. freundii</i> | diarrheal patient  | 2016 | Anhui Province    |
| 18 | 44  | AH2008006   | <i>C. freundii</i> | food               | 2008 | Anhui Province    |
| 18 | 415 | ME160401H   | <i>C. freundii</i> | toe                | 2016 | Ireland           |
| 19 | 187 | AH2016012   | <i>C. freundii</i> | diarrheal patient  | 2016 | Anhui Province    |
| 19 | 189 | AH2014004   | <i>C. freundii</i> | diarrheal patient  | 2014 | Anhui Province    |
| 19 | 243 | CB00004     | <i>C. freundii</i> | urine              | 2017 | USA               |
| 20 | 182 | AH2014009   | <i>C. freundii</i> | diarrheal patient  | 2014 | Anhui Province    |
| 20 | 183 | AH2014026   | <i>C. freundii</i> | diarrheal patient  | 2014 | Anhui Province    |
| 21 | 42  | AH2008004   | <i>C. freundii</i> | food               | 2008 | Anhui Province    |
| 21 | 18  | M8128       | <i>C. freundii</i> | rectal swab        | 2010 | Greece            |
| 21 | 18  | CF_14       | <i>C. freundii</i> | urine              | 2014 | Spain             |
| 21 | 18  | CF-2316     | <i>C. freundii</i> | bronchial aspirate | 2016 | Poland            |
| 21 | 159 | Ci32        | <i>C. freundii</i> | cat                | 2016 | Japan             |
| 22 | 36  | AH2007018   | <i>C. freundii</i> | diarrheal patient  | 2007 | Anhui Province    |
| 22 | 54  | AH2009001   | <i>C. freundii</i> | food               | 2009 | Anhui Province    |
| 22 | 278 | HB2016013   | <i>C. freundii</i> | food               | 2016 | Hebei Province    |
| 23 | 163 | HB2017011   | <i>C. freundii</i> | diarrheal patient  | 2017 | Hebei Province    |

|    |     |               |                    |                   |      |                             |
|----|-----|---------------|--------------------|-------------------|------|-----------------------------|
| 23 | 163 | N16-02392     | <i>C. freundii</i> | water             | 2015 | Canada                      |
| 23 | 406 | /             | <i>C. freundii</i> | /                 | /    | Shandong Province           |
| 24 | 46  | AH2008008     | <i>C. freundii</i> | food              | 2008 | Anhui Province              |
| 24 | 144 | CPO20150025   | <i>C. freundii</i> | urine             | 2015 | Denmark                     |
| 24 | 481 | 29001247      | <i>C. freundii</i> | unknown           | 2019 | The Netherlands             |
| 24 | 395 | /             | <i>C. freundii</i> | /                 | /    | Korea                       |
| 24 | 508 | /             | <i>C. freundii</i> | /                 | /    | Germany                     |
| 24 | 519 | /             | <i>C. freundii</i> | /                 | /    | France                      |
| 25 | 269 | HB2016001     | <i>C. freundii</i> | diarrheal patient | 2016 | Hebei Province              |
| 25 | 219 | AH2015006     | <i>C. freundii</i> | diarrheal patient | 2015 | Anhui Province              |
| 25 | 219 | AH2015017     | <i>C. freundii</i> | human             | 2015 | Anhui Province              |
| 25 | 219 | HB2017023     | <i>C. freundii</i> | diarrheal patient | 2017 | Hebei Province              |
| 26 | 283 | HB2016018     | <i>C. freundii</i> | food              | 2016 | Hebei Province              |
| 26 | 62  | /             | <i>C. freundii</i> | /                 | /    | Republic of South<br>Africa |
| 26 | 91  | CF_7          | <i>C. freundii</i> | urine             | 2012 | Spain                       |
| 26 | 91  | C-M5-U-060615 | <i>C. freundii</i> | urine             | 2015 | USA                         |
| 27 | 86  | AH2011008     | <i>C. freundii</i> | food              | 2011 | Anhui Province              |
| 27 | 86  | AH2011009     | <i>C. freundii</i> | food              | 2011 | Anhui Province              |
| 27 | 124 | Cf5976/16     | <i>C. freundii</i> | catheter          | 2016 | Poland                      |
| 28 | 73  | AH2009013     | <i>C. youngae</i>  | diarrheal patient | 2009 | Anhui Province              |
| 28 | 74  | AH2009014     | <i>C. youngae</i>  | diarrheal patient | 2009 | Anhui Province              |
| 28 | 74  | HB2017021     | <i>C. youngae</i>  | diarrheal patient | 2017 | Hebei Province              |
| 28 | 76  | AH2009016     | <i>C. youngae</i>  | food              | 2009 | Anhui Province              |
| 29 | 38  | AH2007021     | <i>C. youngae</i>  | diarrheal patient | 2007 | Anhui Province              |
| 29 | 39  | AH2007022     | <i>C. youngae</i>  | diarrheal patient | 2007 | Anhui Province              |
| 29 | 39  | AH2007024     | <i>C. youngae</i>  | food              | 2007 | Anhui Province              |
| 29 | 39  | AH2007025     | <i>C. youngae</i>  | food              | 2007 | Anhui Province              |
| 29 | 39  | AH2008001     | <i>C. youngae</i>  | food              | 2008 | Anhui Province              |
| 29 | 39  | AH2008002     | <i>C. youngae</i>  | food              | 2008 | Anhui Province              |
| 29 | 40  | AH2007023     | <i>C. youngae</i>  | human             | 2007 | Anhui Province              |
| 30 | 48  | AH2008010     | <i>C. youngae</i>  | food              | 2008 | Anhui Province              |
| 30 | 187 | HB2016028     | <i>C. youngae</i>  | diarrheal patient | 2016 | Hebei Province              |
| 31 | 60  | AH2009008     | <i>C. youngae</i>  | food              | 2009 | Anhui Province              |
| 31 | 71  | AH2009010     | <i>C. youngae</i>  | food              | 2009 | Anhui Province              |
| 31 | 72  | AH2009011     | <i>C. youngae</i>  | food              | 2009 | Anhui Province              |
| 32 | 75  | AH2009015     | <i>C. youngae</i>  | diarrheal patient | 2009 | Anhui Province              |
| 32 | 77  | AH2009017     | <i>C. youngae</i>  | food              | 2009 | Anhui Province              |
| 33 | 51  | AH2008014     | <i>C. braakii</i>  | food              | 2008 | Anhui Province              |
| 33 | 55  | AH2009002     | <i>C. braakii</i>  | food              | 2009 | Anhui Province              |
| 34 | 58  | AH2009006     | <i>C. braakii</i>  | food              | 2009 | Anhui Province              |
| 34 | 225 | HB2017095     | <i>C. braakii</i>  | food              | 2017 | Hebei Province              |
| 35 | 79  | AH2010001     | <i>C. braakii</i>  | food              | 2010 | Anhui Province              |
| 35 | 385 | HB2017108     | <i>C. braakii</i>  | food              | 2017 | Hebei Province              |

|    |     |           |                   |                   |      |                |
|----|-----|-----------|-------------------|-------------------|------|----------------|
| 36 | 297 | HB2016035 | <i>C. braakii</i> | food              | 2016 | Hebei Province |
| 36 | 297 | HB2017099 | <i>C. braakii</i> | environment       | 2017 | Hebei Province |
| 36 | 355 | HB2017072 | <i>C. braakii</i> | diarrheal patient | 2017 | Hebei Province |
| 37 | 353 | HB2017070 | <i>C. braakii</i> | diarrheal patient | 2017 | Hebei Province |
| 37 | 370 | HB2017090 | <i>C. braakii</i> | food              | 2017 | Hebei Province |
| 38 | 369 | HB2017089 | <i>C. braakii</i> | food              | 2017 | Hebei Province |
| 38 | 378 | HB2017101 | <i>C. braakii</i> | food              | 2017 | Hebei Province |
| 39 | 381 | HB2017104 | <i>C. braakii</i> | food              | 2017 | Hebei Province |
| 39 | 384 | HB2017107 | <i>C. braakii</i> | food              | 2017 | Hebei Province |

# Clonal complexes were defined as STs which shared six of the seven gene alleles. We also extracted all isolates and STs of *C. freundii* from the public MLST database. There are no *C. youngae* or *C. braakii* isolates/STs available from the MLST database except the deposition from our current and previous studies. Clonal complexes were numbered from 1 to 39. ST: sequence types; CCs: clonal complexes; /: no data.

Table S2 Prevalence of MDR isolates in different *Citrobacter* species

| Species            | MDR isolates/all isolates (%) |               |                     |             |               |
|--------------------|-------------------------------|---------------|---------------------|-------------|---------------|
|                    | Diarrheal patients            | Foods         | Healthy individuals | Environment | Total         |
| <i>C. freundii</i> | 28/94 (29.8%)                 | 22/41 (63.7%) | 7/19 (36.8%)        | 1/7 (14.3%) | 58/161 (36.0) |
| <i>C. youngae</i>  | 5/30 (16.7%)                  | 6/24 (25.0%)  | 1/3 (33.3%)         | 0           | 12/57 (21.1)  |
| <i>C. braakii</i>  | 1/8 (12.5%)                   | 22/40 (55.0%) | 0/1 (0)             | 3/4 (75.0%) | 26/53 (49.1)  |

Table S3 Prevalence of Adherence and Cytotoxicity in 128 *Citrobacter* Isolates

| Adhesion     | Cytotoxicity, Number (%) |              |           | Total Number (%) |
|--------------|--------------------------|--------------|-----------|------------------|
|              | High                     | Intermediate | None      |                  |
| High         | 4 (3.1)                  | 7 (5.5)      | 3 (2.3)   | 14 (10.9)        |
| Intermediate | 7 (5.5)                  | 23 (18.0)    | 27 (21.1) | 57 (44.5)        |
| Low          | 2 (1.6)                  | 9 (7.0)      | 26 (20.3) | 37 (28.9)        |
| None         | 0 (0)                    | 1 (0.8)      | 19 (14.8) | 20 (15.6)        |
| All          | 13 (10.2)                | 40 (31.3)    | 75 (58.6) | 128 (100)        |

Table S4 Source, drugs resistance, Genotypes and Antibiotic resistance phenotype of 128 *Citrobacter* Isolates

| Isolates  | Year | Source               | STs | NDR | Antibiotic resistance phenotype                                                       |
|-----------|------|----------------------|-----|-----|---------------------------------------------------------------------------------------|
| HB2016001 | 2016 | Diarrheal patient    | 269 | 1   | (CFX)                                                                                 |
| HB2016002 | 2016 | Diarrheal patient    | 216 | 3   | (AMP)(CTX,CAZ,CFX,TIO)(AZM)                                                           |
| HB2016003 | 2016 | Diarrheal patient    | 270 | 1   | (CFX)                                                                                 |
| HB2016006 | 2016 | Food packing slipway | 272 | 1   | (CFX)                                                                                 |
| HB2016008 | 2016 | Chicken              | 274 | 8   | (AMP)(CTX,FEP,CFX,TIO)(NAL)(GEN,STR)(TET)(CHL)(Sul,SXT)(AMZ)                          |
| HB2016010 | 2016 | Filling staircase    | 276 | 1   | (CFX)                                                                                 |
| HB2016011 | 2016 | Pork                 | 100 | 1   | (CFX)                                                                                 |
| HB2016012 | 2016 | Chicken              | 277 | 2   | (AMP)(CFX)                                                                            |
| HB2016013 | 2016 | Duck                 | 278 | 3   | (AMP)(CFX)(MEM)                                                                       |
| HB2016017 | 2016 | Duck                 | 282 | 1   | (NAL)                                                                                 |
| HB2016018 | 2016 | Chicken              | 283 | 2   | (AMP)(CFX)                                                                            |
| HB2017001 | 2017 | Diarrheal patient    | 169 | 2   | (CFX)(CT)                                                                             |
| HB2017008 | 2017 | Diarrheal patient    | 12  | 5   | (AMP)(CTX,CFX)(TET)(CHL)(SXT)                                                         |
| HB2017011 | 2017 | Diarrheal patient    | 163 | 7   | (AMP)(CTX,CAZ,CFX)(AZM)(NAL,CIP,LEV)(STR)(TET,DOX)(CHL)(SUL,SXT)                      |
| HB2017013 | 2017 | Diarrheal patient    | 307 | 1   | (CFX)                                                                                 |
| HB2017014 | 2017 | Diarrheal patient    | 308 | 1   | (CFX)                                                                                 |
| HB2017018 | 2017 | Diarrheal patient    | 125 | 2   | (CFX)(NAL)                                                                            |
| HB2017019 | 2017 | Diarrheal patient    | 217 | 1   | (CFX)                                                                                 |
| HB2017020 | 2017 | Diarrheal patient    | 310 | 1   | (CFX)                                                                                 |
| HB2017022 | 2017 | Diarrheal patient    | 311 | 2   | (AMP)(CFX)                                                                            |
| HB2017023 | 2017 | Diarrheal patient    | 219 | 3   | (AMP)(CTX,CAZ,CFX,TIO)(AZM)                                                           |
| HB2017024 | 2017 | Diarrheal patient    | 150 | 1   | (CFX)                                                                                 |
| HB2017025 | 2017 | Diarrheal patient    | 312 | 3   | (AMP)(TET)(CHL)                                                                       |
| HB2017027 | 2017 | Diarrheal patient    | 314 | 4   | (AMP)(CFX)(NAL)(TET)                                                                  |
| HB2017030 | 2017 | Diarrheal patient    | 317 | 1   | (TIO)                                                                                 |
| HB2017032 | 2017 | Diarrheal patient    | 319 | 5   | (AMP)(CFX)(TET)(CHL)(SUL,SXT)                                                         |
| HB2017034 | 2017 | Feeder sole          | 100 | 1   | (CFX)                                                                                 |
| HB2017035 | 2017 | Feeder floor         | 321 | 1   | (CFX)                                                                                 |
| HB2017037 | 2017 | Feeder floor         | 323 | 1   | (CFX)                                                                                 |
| HB2017041 | 2017 | Cucumber             | 327 | 1   | (CFX)                                                                                 |
| HB2017043 | 2017 | Minced pork          | 329 | 1   | (CFX)                                                                                 |
| HB2017046 | 2017 | Minced pork          | 332 | 2   | (AMP)(CFX)                                                                            |
| HB2017047 | 2017 | Minced pork          | 333 | 6   | (AMP)(CFX,CTX)(GEN,STR)(TET)(CHL)(SUL,SXT)                                            |
| HB2017049 | 2017 | Minced pork          | 335 | 2   | (AMP)(CFX)                                                                            |
| HB2017051 | 2017 | Minced pork          | 214 | 2   | (CFX)(TET)                                                                            |
| HB2017055 | 2017 | Minced pork          | 161 | 6   | (AMP)(CFX)(NAL)(TET)(SXT)(AMZ)                                                        |
| HB2017056 | 2017 | Minced pork          | 340 | 4   | (AMP)(CFX)(NAL)(TET,DOX)                                                              |
| HB2017057 | 2017 | Minced pork          | 341 | 4   | (CFX)(TET)(CHL)(SUL,SXT)                                                              |
| HB2016004 | 2016 | Diarrheal patient    | 17  | 2   | (AMP)(CFX)                                                                            |
| HB2016019 | 2016 | Pork                 | 284 | 9   | (AMP)(CTX,FEP,CFX,TIO)(MEN)(NAL,LEV)(STR)(TET,DOX)(CHL)(SUL,SXT)(AMZ)                 |
| HB2016023 | 2016 | Pork                 | 288 | 9   | (AMP)(CTX,CAZ,FEP,CFX,TIO)(AZM)(NAL,CIP,LEV)(GEN,KAN,STR)(TET,DOX)(CHL)(SUL,SXT)(AMZ) |
| HB2016024 | 2016 | Vegetables           | 289 | 3   | (AMP)(CTX,CFX,TIO)(NAL,CIP,LEV)                                                       |

|           |      |                   |     |   |                                                                                       |
|-----------|------|-------------------|-----|---|---------------------------------------------------------------------------------------|
| HB2016034 | 2016 | Chicken           | 260 | 7 | (AMP)(CTX,CFX,TIO)(NAL)(STR)(TET,DOX)(CHL)(SUL,SXT)                                   |
| HB2016036 | 2016 | Diarrheal patient | 298 | 2 | (AMP)(CTX,CFX)                                                                        |
| HB2017002 | 2017 | Diarrheal patient | 300 | 1 | (CFX)                                                                                 |
| HB2017003 | 2017 | Diarrheal patient | 301 | 2 | (AMP)(CFX)                                                                            |
| HB2017004 | 2017 | Diarrheal patient | 85  | 2 | (AMP)(CFX)                                                                            |
| HB2017006 | 2017 | Diarrheal patient | 303 | 2 | (CFX)(STR)                                                                            |
| HB2017009 | 2017 | Diarrheal patient | 304 | 4 | (AMP)(CTX,CFX)(TET)(CHL)                                                              |
| HB2017012 | 2017 | Diarrheal patient | 306 | 1 | (CFX)                                                                                 |
| HB2017016 | 2017 | Diarrheal patient | 309 | 1 | (CFX)                                                                                 |
| HB2017017 | 2017 | Diarrheal patient | 1   | 2 | (AMP)(CFX)                                                                            |
| HB2017026 | 2017 | Diarrheal patient | 313 | 6 | (AMP)(TET)(NAL,CIP)(TET,DOX)(CHL)(SUL,SXT)                                            |
| HB2017031 | 2017 | Diarrheal patient | 318 | 2 | (CFX)(AMZ)                                                                            |
| HB2017033 | 2017 | Feeder floor      | 320 | 0 |                                                                                       |
| HB2017036 | 2017 | Feeder floor      | 322 | 3 | (AMP)(CFX)(STR)                                                                       |
| HB2017038 | 2017 | Minced pork       | 324 | 4 | (CFX)(KAN)(TET,DOX)(SUL,SXT)                                                          |
| HB2017039 | 2017 | Minced pork       | 325 | 2 | (AMP)(CFX)                                                                            |
| HB2017040 | 2017 | Leek              | 326 | 8 | (AMP)(CTX,CFX,TIO)(NAL)(STR)(TET,DOX)(CHL)(SUL,SXT)(AMZ)                              |
| HB2017042 | 2017 | Pork              | 328 | 9 | (AMP)(CTX,CAZ,FEP,CFX,TIO)(IMI,MEN)(NAL,CIP,LEV)(GEN,STR)(TET,DOX)(CHL)(SUL,SXT)(AMZ) |
| HB2017045 | 2017 | Pork              | 331 | 7 | (AMP)(CTX,CFX,TIO)(NAL)(GEN,STR)(TET)(CHL)(SUL,SXT)                                   |
| HB2017052 | 2017 | Salad             | 337 | 2 | (AMP)(CFX)                                                                            |
| HB2017053 | 2017 | Pork              | 338 | 4 | (AMP)(CTX,CAZ,CFX,TIO)(AZM)(STR)                                                      |
| HB2017054 | 2017 | Cold noodle       | 339 | 2 | (AMP)(CFX)                                                                            |
| HB2017059 | 2017 | Minced pork       | 343 | 7 | (AMP)(CTX,FEP,CFX,TIO)(AMZ)(GEN,KAN,STR)(TET)(CHL)(SUL,SXT)                           |
| HB2017060 | 2017 | Pork              | 344 | 7 | (AMP)(CTX,FEP,CFX,TIO)(NAL)(GEN,STR)(TET,DOX)(CHL)(SUL,SXT)                           |
| HB2017061 | 2017 | Minced pork       | 1   | 2 | (AMP)(CFX)                                                                            |
| HB2016015 | 2016 | Chicken           | 280 | 5 | (CFX)(NAL)(TET)(CHL)(SUL,SXT)                                                         |
| HB2016032 | 2016 | Feeder sole       | 295 | 5 | (AMP)(CTX,CFX)(STR)(CHL)(SUL,SXT)                                                     |
| HB2016033 | 2016 | Duck              | 296 | 2 | (CFX)(NAL)                                                                            |
| HB2016035 | 2016 | Chicken           | 297 | 6 | (AMP)(CTX,CFX,TIO)(NAL,CIP,LEV)(TET,DOX)(CHL)(SUL,SXT)                                |
| HB2017044 | 2017 | Minced pork       | 330 | 2 | (AMP)(CFX)                                                                            |
| HB2017048 | 2017 | Minced pork       | 334 | 2 | (CFX)(TET,DOX)                                                                        |
| HB2017062 | 2017 | Minced pork       | 345 | 2 | (AMP)(CFX)                                                                            |
| HB2017068 | 2017 | Minced pork       | 351 | 2 | (AMP)(CFX)                                                                            |
| HB2017070 | 2017 | Diarrheal patient | 353 | 2 | (CFX)(NAL)                                                                            |
| HB2017071 | 2017 | Diarrheal patient | 354 | 2 | (AMP)(CFX)                                                                            |
| HB2017072 | 2017 | Diarrheal patient | 355 | 1 | (CFX)                                                                                 |
| HB2017074 | 2017 | Diarrheal patient | 356 | 2 | (AMP)(CFX)                                                                            |
| HB2017072 | 2017 | Diarrheal patient | 357 | 1 | (CFX)                                                                                 |
| HB2017076 | 2017 | Diarrheal patient | 358 | 4 | (AMP)(CFX)(NAL)(TET,DOX)                                                              |
| HB2017077 | 2017 | Diarrheal patient | 357 | 1 | (CFX)                                                                                 |
| HB2017078 | 2017 | Diarrheal patient | 359 | 1 | (NAL,CIP)                                                                             |
| HB2017079 | 2017 | Feeder floor      | 360 | 3 | (AMP)(CFX)(NAL)                                                                       |
| HB2017081 | 2017 | Feeder floor      | 362 | 2 | (AMP)(CFX)                                                                            |
| HB2017082 | 2017 | Chicken           | 363 | 1 | (STR)                                                                                 |

|           |      |                   |     |   |                                                                       |
|-----------|------|-------------------|-----|---|-----------------------------------------------------------------------|
| HB2017083 | 2017 | Pork              | 364 | 1 | (CHL)                                                                 |
| HB2017084 | 2017 | Pork              | 365 | 3 | (CFX)(NAL)(TET)                                                       |
| HB2017087 | 2017 | Pork              | 367 | 8 | (AMP)(CTX,CFX,TIO)(AZM)(NAL)(STR)(TET,DOX)(CHL)(SUL,SXT)              |
| HB2017089 | 2017 | Minced pork       | 369 | 2 | (CFX)(SXT)                                                            |
| HB2017090 | 2017 | Pork              | 370 | 8 | (AMP)(CTX,CFX,TIO)(AZM))(NAL,CIP,LEV)(GEM,STR)(TET,DOX)(SUL,SXT)(AMZ) |
| HB2017091 | 2017 | Minced pork       | 371 | 3 | (CFX)(NAL)(TET,DOX)                                                   |
| HB2017092 | 2017 | Minced pork       | 372 | 4 | (AMP)(CFX)(NAL)(STR)                                                  |
| HB2017093 | 2017 | Minced pork       | 373 | 2 | (CFX)(TET,DOX)                                                        |
| HB2017094 | 2017 | Minced pork       | 81  | 3 | (CFX)(IMI)(AMZ)                                                       |
| HB2017095 | 2017 | Minced pork       | 225 | 6 | (AMP)(CTX,CFX,RIO)(NAL)(TET,DOX)(CHL)(SUL,SXT)                        |
| HB2017096 | 2017 | Pork              | 374 | 6 | (AMP)(CTX,CAZ,FEP,CFX,TIO)(AZM)(STR)(TET,DOX)(SUL,SXT)                |
| HB2017097 | 2017 | Salad             | 375 | 0 |                                                                       |
| HB2017098 | 2017 | Pork              | 376 | 1 | (CFX)                                                                 |
| HB2017099 | 2017 | Floor             | 297 | 6 | (AMP) (CTX,FEP,CFX,TIO)(NAL,CIP,LEV)(STR)(DOX)(SUL,SXT)               |
| HB2017100 | 2017 | Minced pork       | 377 | 2 | (CFX)(STR)                                                            |
| HB2017101 | 2017 | Pork              | 378 | 2 | (CFX)(TET)                                                            |
| HB2017102 | 2017 | Minced pork       | 379 | 3 | (AMP)(CFX)(NAL)                                                       |
| HB2017103 | 2017 | Minced pork       | 380 | 4 | (AMP)(CFX)(NAL)(TET,DOX)                                              |
| HB2017104 | 2017 | Minced pork       | 381 | 3 | (AMP)(CFX)(TET)                                                       |
| HB2017105 | 2017 | Pork              | 382 | 9 | (AMP)(CTX,CFX,TIO)(AZM)(NAL,CIP,LEV)(GEM,STR)(TET)(CHL)(SUL,SXT)(AMZ) |
| HB2017106 | 2017 | Minced pork       | 383 | 4 | (CFX)(NAL)(TET,DOX) (SXT)                                             |
| HB2017107 | 2017 | Minced pork       | 384 | 7 | (AMP)(CFX)(NAL)(KAN,STR)(TET,DOX)(CHL)(SUL,SXT)                       |
| HB2017108 | 2017 | Minced pork       | 385 | 6 | (AMP)(CTX,FEP,CFX,TIO)(AZM)(NAL)(TET,DOX)(SUL,SXT)                    |
| HB2017109 | 2017 | Buckwheat cake    | 386 | 1 | (CFX)                                                                 |
| HB2017110 | 2017 | Salad             | 375 | 0 |                                                                       |
| HB2017111 | 2017 | Green pepper      | 387 | 2 | (AMP)(CFX)                                                            |
| HB2016029 | 2016 | Diarrheal patient | 292 | 1 | (CFX)                                                                 |
| HB2017007 | 2017 | Diarrheal patient | 237 | 8 | (AMP)(CTX,CAZ,CFX)(AZM)(NAL,CIP,LEV)(KAN,STR)(TET,DOX)(CHL)(SUL,SXT)  |
| HB2017021 | 2017 | Diarrheal patient | 74  | 3 | (AMP)(TET)(SUL,SXT)                                                   |
| HB2017029 | 2017 | Diarrheal patient | 316 | 2 | (AMP)(CFX)                                                            |
| HB2017067 | 2017 | Diarrheal patient | 350 | 1 | (CFX)                                                                 |
| HB2017086 | 2017 | Minced pork       | 258 | 2 | (AMP)(CFX)                                                            |
| HB2016026 | 2016 | Diarrheal patient | 183 | 1 | (CFX)                                                                 |
| HB2016027 | 2016 | Diarrheal patient | 291 | 1 | (CFX)                                                                 |
| HB2016028 | 2016 | Diarrheal patient | 187 | 0 |                                                                       |
| HB2016031 | 2016 | Duck              | 294 | 2 | (AMP) (CFX)                                                           |
| HB2017063 | 2017 | Diarrheal patient | 346 | 2 | (AMP)(CFX)                                                            |
| HB2017064 | 2017 | Diarrheal patient | 347 | 0 |                                                                       |
| HB2017065 | 2017 | Diarrheal patient | 348 | 7 | (AMP)(CFX)(NAL)(STR)(TET,DOX)(CHL)(SUL)                               |
| HB2017066 | 2017 | Diarrheal patient | 349 | 0 |                                                                       |
| HB2017069 | 2017 | Egg cake          | 352 | 2 | (AMP)(SUL)                                                            |
| HB2017085 | 2017 | Minced pork       | 366 | 1 | (CFX)                                                                 |

---

ST: sequence types; NDR: number of drugs resistant to.
